# Supplementary material
Source: publisher figshare collection journal article supplement (https://acs.figshare.com/ndownloader/files/3737353)
Supplement: Supplementary file 1 [file 3737353]

data_oa203
_audit_creation_method	'Created with Diamond (www.crystalimpact.com)'
_audit_creation_date	15-06-18
_audit_update_record	15-06-18
_chemical_formula_sum	'C23 H13 B F4 O'
_chemical_formula_weight	392.140
_refine_ls_R_factor_all	0.073
_cell_length_a	 8.0816(7)
_cell_length_b	10.1745(8)
_cell_length_c	11.9752(9)
_cell_angle_alpha	67.764(7)
_cell_angle_beta	71.133(8)
_cell_angle_gamma	71.903(8)
_cell_volume	842.3(1)
_cell_formula_units_Z	2
_symmetry_int_tables_number	2
_symmetry_space_group_name_H-M	'P -1'
_symmetry_space_group_name_Hall	'-P_1'

loop_
_symmetry_equiv_pos_site_id
_symmetry_equiv_pos_as_xyz
1 'x, y, z'
2 '-x, -y, -z'

loop_
_atom_type_symbol
_atom_type_oxidation_number
_atom_type_radius_bond
C	?	1.200
H	?	1.200
B	?	1.200
F	?	1.200
O	?	1.200


loop_
_atom_site_label
_atom_site_type_symbol
_atom_site_fract_x
_atom_site_fract_y
_atom_site_fract_z
_atom_site_occupancy
_atom_site_symmetry_multiplicity
_atom_site_Wyckoff_symbol
_atom_site_attached_hydrogens
_atom_site_calc_flag
_atom_site_thermal_displace_type
_atom_site_u_iso_or_equiv
C1 C  0.8053(3)  0.7581(2)  0.8657(2)  1.000 2 i ? d Uani  0.0291(5)
C2 C  0.8940(3)  0.8567(2)  0.7710(2)  1.000 2 i ? d Uani  0.0318(5)
H2 H  0.8549  0.9572  0.7637  1.000 2 i ? calc Uiso  0.03800
C3 C  1.0434(3)  0.8089(2)  0.6843(2)  1.000 2 i ? d Uani  0.0316(5)
C4 C  1.1431(3)  0.9061(3)  0.5854(2)  1.000 2 i ? d Uani  0.0370(5)
H4 H  1.1115  1.0066  0.5780  1.000 2 i ? calc Uiso  0.04400
C5 C  1.2834(3)  0.8560(3)  0.5015(2)  1.000 2 i ? d Uani  0.0408(6)
H5 H  1.3484  0.9223  0.4356  1.000 2 i ? calc Uiso  0.04900
C6 C  1.3343(3)  0.7065(3)  0.5106(2)  1.000 2 i ? d Uani  0.0402(6)
H6 H  1.4314  0.6738  0.4502  1.000 2 i ? calc Uiso  0.04800
C7 C  1.2442(3)  0.6093(3)  0.6060(2)  1.000 2 i ? d Uani  0.0359(5)
H7 H  1.2800  0.5091  0.6121  1.000 2 i ? calc Uiso  0.04300
C8 C  1.0974(3)  0.6571(2)  0.6961(2)  1.000 2 i ? d Uani  0.0308(5)
C9 C  1.0062(3)  0.5591(2)  0.7966(2)  1.000 2 i ? d Uani  0.0299(5)
H9 H  1.0451  0.4581  0.8056  1.000 2 i ? calc Uiso  0.03600
C10 C  0.8600(3)  0.6057(2)  0.8836(2)  1.000 2 i ? d Uani  0.0277(5)
C11 C  0.7624(3)  0.5094(2)  0.9894(2)  1.000 2 i ? d Uani  0.0273(5)
C12 C  0.8062(3)  0.3563(2)  1.0179(2)  1.000 2 i ? d Uani  0.0307(5)
H12 H  0.9051  0.3117  0.9657  1.000 2 i ? calc Uiso  0.03700
C13 C  0.7068(3)  0.2716(2)  1.1204(2)  1.000 2 i ? d Uani  0.0317(5)
H13 H  0.7396  0.1689  1.1384  1.000 2 i ? calc Uiso  0.03800
C14 C  0.5558(3)  0.3338(2)  1.2002(2)  1.000 2 i ? d Uani  0.0309(5)
C15 C  0.4515(3)  0.2488(3)  1.3051(2)  1.000 2 i ? d Uani  0.0360(5)
H15 H  0.4811  0.1460  1.3241  1.000 2 i ? calc Uiso  0.04300
C16 C  0.3064(3)  0.3134(3)  1.3808(2)  1.000 2 i ? d Uani  0.0376(6)
H16 H  0.2387  0.2546  1.4523  1.000 2 i ? calc Uiso  0.04500
C17 C  0.2590(3)  0.4638(3)  1.3532(2)  1.000 2 i ? d Uani  0.0370(5)
H17 H  0.1577  0.5068  1.4051  1.000 2 i ? calc Uiso  0.04400
C18 C  0.3586(3)  0.5529(2)  1.2497(2)  1.000 2 i ? d Uani  0.0325(5)
C19 C  0.3143(3)  0.7078(3)  1.2171(2)  1.000 2 i ? d Uani  0.0365(5)
H19 H  0.2127  0.7533  1.2671  1.000 2 i ? calc Uiso  0.04400
C20 C  0.4136(3)  0.7921(2)  1.1163(2)  1.000 2 i ? d Uani  0.0368(5)
H20 H  0.3814  0.8950  1.0964  1.000 2 i ? calc Uiso  0.04400
C21 C  0.5641(3)  0.7257(2)  1.0420(2)  1.000 2 i ? d Uani  0.0299(5)
C22 C  0.6136(3)  0.5735(2)  1.0679(2)  1.000 2 i ? d Uani  0.0279(5)
C23 C  0.5092(3)  0.4865(2)  1.1732(2)  1.000 2 i ? d Uani  0.0294(5)
B1 B  0.1954(7)  0.1635(4)  0.7589(3)  0.891(5) 2 i ? d Uani  0.0396(9)
F1 F  0.0755(3)  0.0749(2)  0.8034(2)  0.891(5) 2 i ? d Uani  0.0746(8)
F2 F  0.1941(3)  0.2092(2)  0.8536(2)  0.891(5) 2 i ? d Uani  0.0683(7)
F3 F  0.1369(4)  0.2829(2)  0.6649(2)  0.891(5) 2 i ? d Uani  0.0843(8)
F4 F  0.3585(3)  0.0861(3)  0.7152(3)  0.891(5) 2 i ? d Uani  0.0884(9)
B1' B  0.233(2)  0.146(2)  0.7707(19)  0.109(5) 2 i ? d Uiso  0.060(16)
F1' F  0.121(3)  0.108(3)  0.882(2)  0.109(5) 2 i ? d Uiso  0.120(9)
F2' F  0.273(3)  0.2723(17)  0.749(2)  0.109(5) 2 i ? d Uiso  0.094(7)
F3' F  0.147(3)  0.159(3)  0.686(3)  0.109(5) 2 i ? d Uiso  0.181(16)
F4' F  0.3863(19)  0.0464(16)  0.7669(13)  0.109(5) 2 i ? d Uiso  0.038(4)
O1 O  0.6568(2)  0.8140(2)  0.9446(1)  1.000 2 i ? d Uani  0.0325(4)


loop_
_atom_site_aniso_label
_atom_site_aniso_U_11
_atom_site_aniso_U_22
_atom_site_aniso_U_33
_atom_site_aniso_U_12
_atom_site_aniso_U_13
_atom_site_aniso_U_23
C1  0.0252(10)  0.0333(11)  0.030(1) -0.0033(8) -0.0096(8) -0.0107(9)
C2  0.0312(11)  0.0316(11)  0.0332(11) -0.0067(9) -0.0107(9) -0.0081(9)
C3  0.0287(11)  0.0378(12)  0.0298(10) -0.0074(9) -0.0128(9) -0.0067(9)
C4  0.0355(12)  0.0380(12)  0.0360(11) -0.0091(10) -0.0138(9) -0.0043(9)
C5  0.0351(12)  0.0530(15)  0.0321(11) -0.0157(11) -0.0095(9) -0.0043(10)
C6  0.0313(12)  0.0584(15)  0.0319(11) -0.0096(11) -0.0069(9) -0.0154(11)
C7  0.0316(11)  0.0436(13)  0.0343(11) -0.0069(10) -0.0087(9) -0.0141(10)
C8  0.0272(11)  0.0402(12)  0.0293(10) -0.0067(9) -0.0123(8) -0.0110(9)
C9  0.0284(11)  0.0324(11)  0.0318(10) -0.0054(8) -0.0115(9) -0.0100(9)
C10  0.0262(10)  0.0327(11)  0.0277(10) -0.0053(8) -0.0117(8) -0.0094(8)
C11  0.025(1)  0.0327(11)  0.0283(10) -0.0051(8) -0.0122(8) -0.0097(8)
C12  0.0278(11)  0.0344(11)  0.0318(10) -0.0039(9) -0.0114(8) -0.0109(9)
C13  0.0335(11)  0.0306(11)  0.0338(11) -0.0054(9) -0.0163(9) -0.0073(9)
C14  0.0301(11)  0.0366(11)  0.029(1) -0.0091(9) -0.0129(9) -0.0070(9)
C15  0.0380(12)  0.0396(12)  0.0332(11) -0.013(1) -0.0146(9) -0.0054(9)
C16  0.0366(12)  0.0495(14)  0.0289(11) -0.0179(10) -0.0093(9) -0.0062(10)
C17  0.0310(11)  0.0529(14)  0.0310(11) -0.0134(10) -0.0062(9) -0.0146(10)
C18  0.0285(11)  0.0429(13)  0.0310(11) -0.0076(9) -0.0098(9) -0.0144(9)
C19  0.0311(11)  0.0448(13)  0.0371(12) -0.0069(9) -0.0049(9) -0.020(1)
C20  0.0366(12)  0.0354(12)  0.0403(12) -0.005(1) -0.0086(10) -0.0161(10)
C21  0.0292(11)  0.0347(11)  0.0282(10) -0.0090(9) -0.0083(8) -0.0092(9)
C22  0.0261(11)  0.0327(11)  0.0283(10) -0.0067(9) -0.0104(8) -0.0094(9)
C23  0.0289(11)  0.0369(12)  0.0273(10) -0.0082(9) -0.0119(8) -0.0098(9)
B1  0.0423(18)  0.0339(17)  0.0402(18) -0.0071(14) -0.0023(16) -0.0158(13)
F1  0.0519(11)  0.0480(11)  0.1255(19) -0.0145(9) -0.0285(11) -0.0192(11)
F2  0.0706(13)  0.0716(13)  0.0821(15)  0.0109(10) -0.0402(11) -0.0467(11)
F3  0.131(2)  0.0562(13)  0.0412(10) -0.0051(12) -0.0105(11) -0.0086(9)
F4  0.0564(14)  0.0666(16)  0.111(2) -0.0014(12)  0.0243(15) -0.0397(16)
O1  0.0315(8)  0.0312(8)  0.0330(8) -0.0051(6) -0.0055(6) -0.0108(6)

loop_
_geom_bond_atom_site_symbol_1
_geom_bond_atom_site_symbol_2
_geom_bond_site_symmetry_1
_geom_bond_site_symmetry_2
_geom_bond_distance
_geom_bond_publ_flag
C1 C2 . .  1.366(3) no
C1 O1 . .  1.381(2) no
C1 C10 . .  1.424(3) no
C2 C3 . .  1.407(3) no
C3 C4 . .  1.422(3) no
C3 C8 . .  1.432(3) no
C4 C5 . .  1.359(3) no
C5 C6 . .  1.417(4) no
C6 C7 . .  1.367(3) no
C7 C8 . .  1.421(3) no
C8 C9 . .  1.401(3) no
C9 C10 . .  1.391(3) no
C10 C11 . .  1.443(3) no
C11 C22 . .  1.414(3) no
C11 C12 . .  1.415(3) no
C12 C13 . .  1.373(3) no
C13 C14 . .  1.424(3) no
C14 C15 . .  1.408(3) no
C14 C23 . .  1.412(3) no
C15 C16 . .  1.384(3) no
C16 C17 . .  1.390(3) no
C17 C18 . .  1.401(3) no
C18 C23 . .  1.419(3) no
C18 C19 . .  1.428(3) no
C19 C20 . .  1.362(3) no
C20 C21 . .  1.404(3) no
C21 O1 . .  1.337(3) no
C21 C22 . .  1.409(3) no
C22 C23 . .  1.420(3) no
B1 F4 . .  1.361(4) no
B1 F1 . .  1.370(4) no
B1 F2 . .  1.376(4) no
B1 F3 . .  1.385(5) no
B1' F4' . .  1.334(15) no
B1' F2' . .  1.337(15) no
B1' F1' . .  1.339(15) no
B1' F3' . .  1.346(15) no

loop_
_geom_angle_atom_site_symbol_1
_geom_angle_atom_site_symbol_2
_geom_angle_atom_site_symbol_3
_geom_angle_site_symmetry_1
_geom_angle_site_symmetry_2
_geom_angle_site_symmetry_3
_geom_angle
_geom_angle_publ_flag
C2 C1 O1 . . . 116.26(18) no
C2 C1 C10 . . . 122.83(19) no
O1 C1 C10 . . . 120.91(18) no
C1 C2 C3 . . . 119.7(2) no
C2 C3 C4 . . . 122.2(2) no
C2 C3 C8 . . . 119.0(2) no
C4 C3 C8 . . . 118.8(2) no
C5 C4 C3 . . . 120.4(2) no
C4 C5 C6 . . . 121.1(2) no
C7 C6 C5 . . . 120.3(2) no
C6 C7 C8 . . . 120.4(2) no
C9 C8 C7 . . . 121.5(2) no
C9 C8 C3 . . . 119.46(19) no
C7 C8 C3 . . . 119.1(2) no
C10 C9 C8 . . . 121.7(2) no
C9 C10 C1 . . . 117.23(19) no
C9 C10 C11 . . . 123.98(19) no
C1 C10 C11 . . . 118.79(18) no
C22 C11 C12 . . . 118.71(19) no
C22 C11 C10 . . . 117.41(19) no
C12 C11 C10 . . . 123.87(19) no
C13 C12 C11 . . . 120.57(19) no
C12 C13 C14 . . . 121.7(2) no
C15 C14 C23 . . . 118.9(2) no
C15 C14 C13 . . . 122.4(2) no
C23 C14 C13 . . . 118.69(19) no
C16 C15 C14 . . . 120.6(2) no
C15 C16 C17 . . . 120.5(2) no
C16 C17 C18 . . . 120.9(2) no
C17 C18 C23 . . . 118.7(2) no
C17 C18 C19 . . . 122.9(2) no
C23 C18 C19 . . . 118.48(19) no
C20 C19 C18 . . . 121.8(2) no
C19 C20 C21 . . . 119.4(2) no
O1 C21 C20 . . . 116.74(19) no
O1 C21 C22 . . . 121.63(18) no
C20 C21 C22 . . . 121.62(19) no
C21 C22 C11 . . . 120.54(19) no
C21 C22 C23 . . . 118.53(19) no
C11 C22 C23 . . . 120.93(19) no
C14 C23 C18 . . . 120.5(2) no
C14 C23 C22 . . . 119.42(19) no
C18 C23 C22 . . . 120.1(2) no
F4 B1 F1 . . . 107.8(3) no
F4 B1 F2 . . . 112.7(4) no
F1 B1 F2 . . . 108.3(3) no
F4 B1 F3 . . . 111.3(3) no
F1 B1 F3 . . . 107.5(4) no
F2 B1 F3 . . . 109.1(3) no
F4' B1' F2' . . . 107.1(12) no
F4' B1' F1' . . . 110.1(13) no
F2' B1' F1' . . . 110.3(13) no
F4' B1' F3' . . . 112.7(14) no
F2' B1' F3' . . . 109.9(13) no
F1' B1' F3' . . . 106.8(13) no
C21 O1 C1 . . . 120.65(16) no
